# Supplementary material for: USP15 promotes the progression of papillary thyroid cancer by regulating HMGB1 stability through its deubiquitination
Source: PubMed Central journal article supplement (PMC10988300; doi:10.7150/jca.92386), 2024-03-11
Supplement: jcav15p2561s1.pdf [file jcav15p2561s1.pdf]

**Figure S1.** The protein expression (A) and mRNA transcription (B) levels of HMGB1 in HEK-293T cells transfected with HMGB1 ShRNA. \*\*\*P<0.001.

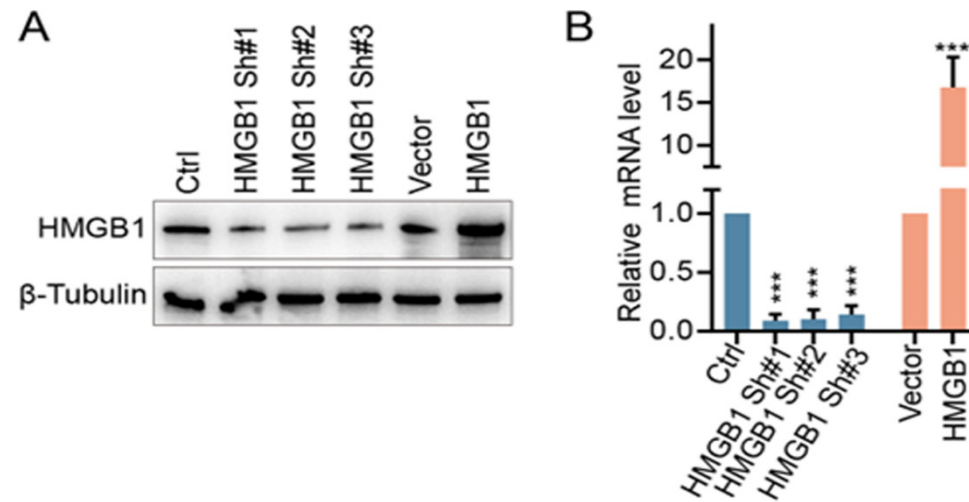

**Table S1** The enriched protein peptides were analyzed by mass spectrometry

| Accession | Protein names                                                   | Gene names | MW [kDa] | Protein score | Sequence coverage (%) | # Unique Peptides | # Peptides | # PSMs |
|-----------|-----------------------------------------------------------------|------------|----------|---------------|-----------------------|-------------------|------------|--------|
| P09429    | High mobility group protein B1                                  | HMGB1      | 24.9     | 1072          | 24                    | 26                | 29         | 32     |
| Q00839    | Heterogeneous nuclear ribonucleoprotein U                       | HNRNPU     | 90.5     | 879           | 26                    | 20                | 23         | 25     |
| Q9Y4E8    | Ubiquitin carboxyl-terminal hydrolase 15                        | USP15      | 112.4    | 571           | 30                    | 20                | 21         | 20     |
| Q9NZB2    | Constitutive coactivator of PPAR-gamma-like protein 1           | FAM120A    | 121.8    | 738           | 26                    | 19                | 20         | 21     |
| P11177    | Pyruvate dehydrogenase E1 component subunit beta, mitochondrial | PDHB       | 39.2     | 1111          | 50                    | 17                | 18         | 33     |
| Q96JN8    | Neuralized-like protein 4                                       | NEURL4     | 166.8    | 331           | 13                    | 15                | 15         | 13     |
| P23396    | 40S ribosomal protein S3                                        | RPS3       | 26.7     | 375           | 47                    | 14                | 19         | 13     |
| Q96PK6    | RNA-binding protein 14                                          | RBM14      | 69.4     | 395           | 19                    | 13                | 15         | 13     |
| P62241    | 40S ribosomal protein S8                                        | RPS8       | 24.2     | 295           | 54                    | 12                | 13         | 11     |
| Q12906    | Interleukin enhancer-binding factor 3                           | ILF3       | 95.3     | 301           | 12                    | 11                | 16         | 10     |
| O00567    | Nucleolar protein 56                                            | NOP56      | 66       | 441           | 29                    | 11                | 16         | 12     |
| P27635    | 60S ribosomal protein L10                                       | RPL10      | 24.6     | 224           | 38                    | 11                | 15         | 8      |
| P62424    | 60S ribosomal protein L7a                                       | RPL7A      | 30       | 365           | 26                    | 10                | 11         | 10     |
| P11940    | Polyadenylate-binding protein 1                                 | PABPC1     | 70.6     | 565           | 24                    | 10                | 11         | 18     |
| Q15424    | Scaffold attachment factor B1                                   | SAFB       | 102.6    | 99            | 7                     | 10                | 11         | 7      |
| P62906    | 60S ribosomal protein L10a                                      | RPL10A     | 24.8     | 263           | 41                    | 10                | 14         | 12     |
| P62249    | 40S ribosomal protein S16                                       | RPS16      | 16.4     | 182           | 43                    | 9                 | 14         | 9      |
| P46782    | 40S ribosomal protein S5                                        | RPS5       | 22.9     | 331           | 34                    | 9                 | 9          | 8      |
| Q99459    | Cell division cycle 5-like protein                              | CDC5L      | 92.2     | 342           | 14                    | 9                 | 11         | 8      |
| P51991    | Heterogeneous nuclear ribonucleoprotein A3                      | HNRNPA3    | 39.6     | 199           | 19                    | 9                 | 13         | 10     |
| P40429    | 60S ribosomal protein L13a                                      | RPL13A     | 23.6     | 200           | 26                    | 9                 | 10         | 7      |
| P31943    | Heterogeneous nuclear ribonucleoprotein H                       | HNRNPH1    | 49.2     | 884           | 37                    | 9                 | 13         | 21     |
| Q9UQE7    | Structural maintenance of chromosomes protein 3                 | SMC3       | 141.5    | 160           | 8                     | 9                 | 13         | 7      |
| Q9HAU5    | Regulator of nonsense transcripts 2                             | UPF2       | 147.7    | 161           | 6                     | 9                 | 14         | 6      |

|        |                                                                             |         |       |     |    |   |    |    |
|--------|-----------------------------------------------------------------------------|---------|-------|-----|----|---|----|----|
| P60842 | Eukaryotic initiation factor 4A-1                                           | EIF4A1  | 46.1  | 187 | 17 | 8 | 12 | 6  |
| Q96B26 | Exosome complex component RRP43                                             | EXOSC8  | 30    | 157 | 27 | 8 | 12 | 7  |
| P46087 | Probable 28S rRNA (cytosine(4447)-C(5))-methyltransferase                   | NOP2    | 89.2  | 279 | 14 | 8 | 12 | 8  |
| Q15029 | 116 kDa U5 small nuclear ribonucleoprotein component                        | EFTUD2  | 109.4 | 158 | 10 | 8 | 10 | 6  |
| Q9NY93 | Probable ATP-dependent RNA helicase DDX56                                   | DDX56   | 61.6  | 203 | 14 | 8 | 9  | 5  |
| Q9HCD5 | Nuclear receptor coactivator 5                                              | NCOA5   | 65.5  | 245 | 17 | 8 | 8  | 7  |
| P61513 | 60S ribosomal protein L37a                                                  | RPL37A  | 10.3  | 139 | 51 | 7 | 7  | 5  |
| P52292 | Importin subunit alpha-1                                                    | KPNA2   | 57.8  | 320 | 22 | 7 | 11 | 10 |
| Q9NZI8 | Insulin-like growth factor 2 mRNA-binding protein 1                         | IGF2BP1 | 63.4  | 361 | 15 | 7 | 7  | 7  |
| Q9NX05 | Constitutive coactivator of PPAR-gamma-like protein 2                       | FAM120C | 120.5 | 233 | 10 | 7 | 8  | 8  |
| P49207 | 60S ribosomal protein L34                                                   | RPL34   | 13.3  | 79  | 29 | 7 | 9  | 4  |
| P55060 | Exportin-2                                                                  | CSE1L   | 110.3 | 207 | 6  | 7 | 9  | 6  |
| Q07666 | KH domain-containing, RNA-binding, signal transduction-associated protein 1 | KHDRBS1 | 48.2  | 200 | 12 | 7 | 7  | 7  |
| Q03701 | CCAAT/enhancer-binding protein zeta                                         | CEBPZ   | 120.9 | 87  | 7  | 7 | 9  | 4  |
| O43684 | Mitotic checkpoint protein BUB3                                             | BUB3    | 37.1  | 129 | 13 | 7 | 12 | 5  |
| O43791 | Speckle-type POZ protein                                                    | SPOP    | 42.1  | 207 | 12 | 7 | 10 | 3  |
| Q5JTH9 | RRP12-like protein                                                          | RRP12   | 143.6 | 92  | 5  | 7 | 11 | 3  |
| Q7Z2W4 | Zinc finger CCCH-type antiviral protein 1                                   | ZC3HAV1 | 101.4 | 72  | 5  | 7 | 10 | 3  |
| Q96SB4 | SRSF protein kinase 1                                                       | SRPK1   | 74.3  | 63  | 8  | 7 | 9  | 5  |
| P62081 | 40S ribosomal protein S7                                                    | RPS7    | 22.1  | 260 | 42 | 7 | 9  | 10 |
| Q9BU76 | Multiple myeloma tumor-associated protein 2                                 | MMTAG2  | 29.4  | 62  | 11 | 6 | 11 | 2  |
| P22234 | Multifunctional protein ADE2                                                | PAICS   | 47    | 75  | 12 | 6 | 11 | 4  |
| Q13823 | Nucleolar GTP-binding protein 2                                             | GNL2    | 83.6  | 242 | 9  | 6 | 9  | 5  |
| P51114 | Fragile X mental retardation syndrome-related protein 1                     | FXR1    | 69.7  | 171 | 16 | 6 | 7  | 7  |
| P34932 | Heat shock 70 kDa protein 4                                                 | HSPA4   | 94.3  | 170 | 6  | 6 | 8  | 3  |
| P25205 | DNA replication licensing factor MCM3                                       | MCM3    | 90.9  | 131 | 8  | 6 | 7  | 5  |
| P14866 | Heterogeneous nuclear ribonucleoprotein L                                   | HNRNPL  | 64.1  | 82  | 6  | 6 | 9  | 3  |
| P63173 | 60S ribosomal protein L38                                                   | RPL38   | 8.2   | 203 | 38 | 6 | 8  | 7  |
| P18077 | 60S ribosomal protein L35a                                                  | RPL35A  | 12.5  | 50  | 18 | 6 | 6  | 2  |
| P62266 | 40S ribosomal protein S23                                                   | RPS23   | 15.8  | 182 | 36 | 6 | 7  | 5  |
| Q8WXX5 | DnaJ homolog subfamily C member 9                                           | DNAJC9  | 29.9  | 128 | 13 | 6 | 7  | 4  |
| Q15269 | Periodic tryptophan protein 2 homolog                                       | PWP2    | 102.4 | 37  | 3  | 6 | 8  | 4  |
| Q08170 | Serine/arginine-rich splicing factor 4                                      | SRSF4   | 56.6  | 139 | 10 | 6 | 10 | 6  |
| Q8NHQ9 | ATP-dependent RNA helicase DDX55                                            | DDX55   | 68.5  | 77  | 10 | 6 | 10 | 4  |
| P00558 | Phosphoglycerate kinase 1                                                   | PGK1    | 44.6  | 117 | 12 | 6 | 6  | 6  |
| Q14739 | Delta(14)-sterol reductase LBR                                              | LBR     | 70.7  | 50  | 5  | 6 | 7  | 2  |

|        |                                                            |        |       |     |    |   |    |    |
|--------|------------------------------------------------------------|--------|-------|-----|----|---|----|----|
| Q13310 | Polyadenylate-binding protein 4                            | PABPC4 | 70.7  | 423 | 22 | 6 | 7  | 10 |
| Q13347 | Eukaryotic translation initiation factor 3 subunit I       | EIF3I  | 36.5  | 60  | 7  | 6 | 9  | 3  |
| P06733 | Alpha-enolase                                              | ENO1   | 47.1  | 172 | 16 | 6 | 8  | 6  |
| P62854 | 40S ribosomal protein S26                                  | RPS26  | 13    | 94  | 37 | 6 | 6  | 6  |
| Q9H814 | Phosphorylated adapter RNA export protein                  | PHAX   | 44.4  | 69  | 7  | 5 | 8  | 3  |
| Q6ZN17 | Protein lin-28 homolog B                                   | LIN28B | 27.1  | 28  | 9  | 5 | 10 | 1  |
| P41252 | Isoleucine--tRNA ligase, cytoplasmic                       | IARS1  | 144.4 | 82  | 1  | 5 | 7  | 2  |
| Q9P035 | Very-long-chain (3R)-3-hydroxyacyl-CoA dehydratase 3       | HACD3  | 43.1  | 128 | 11 | 5 | 6  | 3  |
| O95980 | Reversion-inducing cysteine-rich protein with Kazal motifs | RECK   | 106.4 | 26  | 1  | 5 | 8  | 1  |
| P14635 | G2/mitotic-specific cyclin-B1                              | CCNB1  | 48.3  | 30  | 6  | 5 | 7  | 1  |
| Q9UK59 | Lariat debranching enzyme                                  | DBR1   | 61.5  | 30  | 5  | 5 | 9  | 2  |
| Q96ME7 | Zinc finger protein 512                                    | ZNF512 | 64.6  | 21  | 3  | 5 | 9  | 1  |
| O60231 | Pre-mRNA-splicing factor ATP-dependent RNA helicase DHX16  | DHX16  | 119.2 | 49  | 2  | 5 | 9  | 2  |
| Q3SXM5 | Inactive hydroxysteroid dehydrogenase-like protein 1       | HSDL1  | 37    | 67  | 5  | 5 | 10 | 3  |
| P17987 | T-complex protein 1 subunit alpha                          | TCP1   | 60.3  | 43  | 3  | 5 | 6  | 1  |
| Q9NWH9 | SAFB-like transcription modulator                          | SLTM   | 117.1 | 70  | 4  | 5 | 9  | 1  |
| Q86UK5 | Limbin                                                     | EVC2   | 147.9 | 28  | 1  | 5 | 5  | 3  |
| Q8NEY8 | Periphilin-1                                               | PPHLN1 | 52.7  | 34  | 3  | 5 | 10 | 2  |
| Q9GZR7 | ATP-dependent RNA helicase DDX24                           | DDX24  | 96.3  | 176 | 7  | 5 | 5  | 4  |
| A6NHL2 | Tubulin alpha chain-like 3                                 | TUBAL3 | 49.9  | 191 | 10 | 5 | 7  | 5  |
| Q86UK7 | E3 ubiquitin-protein ligase ZNF598                         | ZNF598 | 98.6  | 35  | 4  | 5 | 10 | 2  |
| Q02790 | Peptidyl-prolyl cis-trans isomerase FKBP4                  | FKBP4  | 51.8  | 122 | 4  | 5 | 7  | 2  |
| Q96SB8 | Structural maintenance of chromosomes protein 6            | SMC6   | 126.2 | 47  | 3  | 5 | 9  | 3  |
| Q14683 | Structural maintenance of chromosomes protein 1A           | SMC1A  | 143.1 | 102 | 5  | 5 | 9  | 5  |
| P61163 | Alpha-centractin                                           | ACTR1A | 42.6  | 54  | 5  | 5 | 10 | 2  |
| P55081 | Microfibrillar-associated protein 1                        | MFAP1  | 51.9  | 21  | 6  | 5 | 5  | 3  |
| O95232 | Luc7-like protein 3                                        | LUC7L3 | 51.4  | 95  | 7  | 5 | 5  | 3  |
| Q6UUV7 | CREB-regulated transcription coactivator 3                 | CRTC3  | 66.9  | 61  | 6  | 5 | 8  | 2  |
| P42167 | Lamina-associated polypeptide 2, isoforms beta/gamma       | TMPO   | 50.6  | 42  | 3  | 5 | 10 | 3  |
| Q709F0 | Acyl-CoA dehydrogenase family member 11                    | ACAD11 | 87.2  | 26  | 3  | 5 | 8  | 3  |
| Q92804 | TATA-binding protein-associated factor 2N                  | TAF15  | 61.8  | 217 | 17 | 5 | 10 | 6  |
| P80404 | 4-aminobutyrate aminotransferase, mitochondrial            | ABAT   | 56.4  | 26  | 4  | 5 | 5  | 2  |
| P22314 | Ubiquitin-like modifier-activating enzyme 1                | UBA1   | 117.8 | 84  | 7  | 5 | 7  | 4  |
| Q99623 | Prohibitin-2                                               | PHB2   | 33.3  | 41  | 6  | 5 | 6  | 3  |

|        |                                                                                |          |       |     |    |   |    |    |
|--------|--------------------------------------------------------------------------------|----------|-------|-----|----|---|----|----|
| Q15120 | [Pyruvate dehydrogenase (acetyl-transferring)] kinase isozyme 3, mitochondrial | PDK3     | 46.9  | 43  | 4  | 5 | 6  | 2  |
| P45974 | Ubiquitin carboxyl-terminal hydrolase 5                                        | USP5     | 95.7  | 88  | 3  | 5 | 7  | 2  |
| Q14320 | Protein FAM50A                                                                 | FAM50A   | 40.2  | 31  | 3  | 5 | 9  | 2  |
| Q96QV6 | Histone H2A type 1-A                                                           | H2AC1    | 14.2  | 29  | 19 | 5 | 8  | 1  |
| Q2NL82 | Pre-rRNA-processing protein TSR1 homolog                                       | TSR1     | 91.8  | 105 | 4  | 5 | 5  | 4  |
| Q99714 | 3-hydroxyacyl-CoA dehydrogenase type-2                                         | HSD17B10 | 26.9  | 28  | 7  | 5 | 10 | 1  |
| P29372 | DNA-3-methyladenine glycosylase                                                | MPG      | 32.8  | 50  | 7  | 5 | 6  | 2  |
| Q13838 | Spliceosome RNA helicase DDX39B                                                | DDX39B   | 49    | 93  | 12 | 5 | 6  | 6  |
| P31040 | Succinate dehydrogenase [ubiquinone] flavoprotein subunit, mitochondrial       | SDHA     | 72.6  | 70  | 3  | 5 | 7  | 1  |
| Q9UKX7 | Nuclear pore complex protein Nup50                                             | NUP50    | 50.1  | 37  | 5  | 5 | 8  | 3  |
| Q9Y314 | Nitric oxide synthase-interacting protein                                      | NOSIP    | 33.2  | 25  | 7  | 5 | 5  | 3  |
| Q6UXN9 | WD repeat-containing protein 82                                                | WDR82    | 35.1  | 63  | 7  | 5 | 8  | 2  |
| Q14974 | Importin subunit beta-1                                                        | KPNB1    | 97.1  | 32  | 3  | 5 | 5  | 3  |
| Q9ULX6 | A-kinase anchor protein 8-like                                                 | AKAP8L   | 71.6  | 40  | 2  | 5 | 7  | 1  |
| Q9BZZ5 | Apoptosis inhibitor 5                                                          | API5     | 59    | 220 | 10 | 5 | 5  | 5  |
| Q7Z478 | ATP-dependent RNA helicase DHX29                                               | DHX29    | 155.1 | 150 | 5  | 5 | 6  | 4  |
| Q53GQ0 | Very-long-chain 3-oxoacyl-CoA reductase                                        | HSD17B12 | 34.3  | 50  | 4  | 5 | 6  | 3  |
| Q9BRJ6 | Uncharacterized protein C7orf50                                                | C7orf50  | 22.1  | 45  | 8  | 5 | 7  | 3  |
| Q6DKI1 | 60S ribosomal protein L7-like 1                                                | RPL7L1   | 29.7  | 24  | 4  | 5 | 9  | 2  |
| Q8NBS9 | Thioredoxin domain-containing protein 5                                        | TXNDC5   | 47.6  | 26  | 7  | 5 | 5  | 1  |
| Q14240 | Eukaryotic initiation factor 4A-II                                             | EIF4A2   | 46.4  | 347 | 18 | 5 | 9  | 12 |
| P32119 | Peroxiredoxin-2                                                                | PRDX2    | 21.9  | 46  | 11 | 5 | 8  | 3  |
| Q15050 | Ribosome biogenesis regulatory protein homolog                                 | RRS1     | 41.2  | 95  | 10 | 4 | 8  | 3  |
| Q8IY37 | Probable ATP-dependent RNA helicase DHX37                                      | DHX37    | 129.5 | 47  | 3  | 4 | 6  | 3  |
| O60841 | Eukaryotic translation initiation factor 5B                                    | EIF5B    | 138.7 | 33  | 1  | 4 | 5  | 3  |
| P52597 | Heterogeneous nuclear ribonucleoprotein F                                      | HNRNPF   | 45.6  | 281 | 26 | 4 | 5  | 10 |
| Q86XZ4 | Spermatogenesis-associated serine-rich protein 2                               | SPATS2   | 59.5  | 71  | 6  | 4 | 6  | 3  |
| P53007 | Tricarboxylate transport protein, mitochondrial                                | SLC25A1  | 34    | 27  | 3  | 4 | 9  | 3  |
| P01706 | Immunoglobulin lambda variable 2-11                                            | IGLV2-11 | 12.6  | 42  | 9  | 4 | 8  | 3  |
| P13804 | Electron transfer flavoprotein subunit alpha, mitochondrial                    | ETFA     | 35.1  | 54  | 5  | 4 | 8  | 3  |
| P00505 | Aspartate aminotransferase, mitochondrial                                      | GOT2     | 47.5  | 27  | 3  | 4 | 5  | 3  |
| Q9BYN8 | 28S ribosomal protein S26, mitochondrial                                       | MRPS26   | 24.2  | 28  | 9  | 4 | 8  | 3  |
| Q13164 | Mitogen-activated protein kinase 7                                             | MAPK7    | 88.3  | 27  | 1  | 4 | 6  | 2  |
| P17980 | 26S proteasome regulatory subunit 6A                                           | PSMC3    | 49.2  | 40  | 5  | 4 | 9  | 1  |
| Q9UKK9 | ADP-sugar pyrophosphatase                                                      | NUDT5    | 24.3  | 27  | 5  | 4 | 7  | 3  |

|            |                                                                                  |           |       |     |    |   |   |   |
|------------|----------------------------------------------------------------------------------|-----------|-------|-----|----|---|---|---|
| Q9NYL2     | Mitogen-activated protein kinase kinase kinase 20                                | MAP3K20   | 91.1  | 74  | 2  | 4 | 5 | 1 |
| P60866     | 40S ribosomal protein S20                                                        | RPS20     | 13.4  | 95  | 21 | 4 | 4 | 2 |
| P56537     | Eukaryotic translation initiation factor 6                                       | EIF6      | 26.6  | 29  | 6  | 4 | 8 | 2 |
| A6NKL6     | Transmembrane protein 200C                                                       | TMEM200C  | 63.9  | 26  | 1  | 4 | 7 | 3 |
| P42704     | Leucine-rich PPR motif-containing protein, mitochondrial                         | LRPPRC    | 157.8 | 94  | 3  | 4 | 8 | 3 |
| Q13868     | Exosome complex component RRP4                                                   | EXOSC2    | 32.8  | 237 | 24 | 4 | 8 | 5 |
| P52926     | High mobility group protein HMGI-C                                               | HMGA2     | 11.8  | 22  | 22 | 4 | 6 | 2 |
| Q9HAV4     | Exportin-5                                                                       | XPO5      | 136.2 | 29  | 1  | 4 | 8 | 3 |
| Q92900     | Regulator of nonsense transcripts 1                                              | UPF1      | 124.3 | 48  | 1  | 4 | 8 | 2 |
| Q7Z333     | Probable helicase senataxin                                                      | SETX      | 302.7 | 24  | 0  | 4 | 6 | 1 |
| P54819     | Adenylate kinase 2, mitochondrial                                                | AK2       | 26.5  | 70  | 10 | 4 | 8 | 3 |
| A6NHR9     | Structural maintenance of chromosomes flexible hinge domain-containing protein 1 | SMCHD1    | 226.2 | 46  | 3  | 4 | 4 | 2 |
| Q9ULX3     | RNA-binding protein NOB1                                                         | NOB1      | 46.6  | 34  | 4  | 4 | 8 | 3 |
| Q9Y421     | Protein FAM32A                                                                   | FAM32A    | 13.2  | 30  | 9  | 4 | 7 | 1 |
| Q86SU0     | Immunoglobulin-like domain-containing receptor 1                                 | ILDR1     | 62.8  | 29  | 2  | 4 | 4 | 3 |
| Q86YQ8     | Copine-8                                                                         | CPNE8     | 63.1  | 54  | 2  | 4 | 7 | 2 |
| Q86VP6     | Cullin-associated NEDD8-dissociated protein 1                                    | CAND1     | 136.3 | 33  | 1  | 4 | 9 | 2 |
| Q9BQ52     | Zinc phosphodiesterase ELAC protein 2                                            | ELAC2     | 92.2  | 29  | 3  | 4 | 5 | 3 |
| Q9Y520     | Protein PRRC2C                                                                   | PRRC2C    | 316.7 | 23  | 1  | 4 | 4 | 3 |
| Q13247     | Serine/arginine-rich splicing factor 6                                           | SRSF6     | 39.6  | 51  | 4  | 4 | 9 | 2 |
| Q5C9Z4     | Nucleolar MIF4G domain-containing protein 1                                      | NOM1      | 96.2  | 81  | 4  | 4 | 9 | 1 |
| P42677     | 40S ribosomal protein S27                                                        | RPS27     | 9.5   | 90  | 32 | 4 | 6 | 5 |
| Q9BY44     | Eukaryotic translation initiation factor 2A                                      | EIF2A     | 64.9  | 66  | 5  | 4 | 9 | 3 |
| P52732     | Kinesin-like protein KIF11                                                       | KIF11     | 119.1 | 31  | 3  | 4 | 9 | 3 |
| Q96CU9     | FAD-dependent oxidoreductase domain-containing protein 1                         | FOXRED1   | 53.8  | 40  | 4  | 4 | 7 | 1 |
| Q9BPU6     | Dihydropyrimidinase-related protein 5                                            | DPYSL5    | 61.4  | 31  | 3  | 4 | 7 | 2 |
| P62195     | 26S proteasome regulatory subunit 8                                              | PSMC5     | 45.6  | 65  | 3  | 4 | 8 | 1 |
| O75367     | Core histone macro-H2A.1                                                         | MACROH2A1 | 39.6  | 43  | 5  | 4 | 5 | 3 |
| P08195     | 4F2 cell-surface antigen heavy chain                                             | SLC3A2    | 68    | 46  | 5  | 4 | 8 | 4 |
| A0A0C4DH72 | Immunoglobulin kappa variable 1-6                                                | IGKV1-6   | 12.7  | 26  | 14 | 4 | 9 | 3 |
| Q9NPD3     | Exosome complex component RRP41                                                  | EXOSC4    | 26.4  | 93  | 11 | 4 | 5 | 2 |
| P04196     | Histidine-rich glycoprotein                                                      | HRG       | 59.5  | 44  | 2  | 4 | 4 | 2 |
| Q9HCM2     | Plexin-A4                                                                        | PLXNA4    | 212.3 | 23  | 2  | 4 | 9 | 3 |
| P24539     | ATP synthase F(0) complex subunit B1, mitochondrial                              | ATP5PB    | 28.9  | 29  | 3  | 4 | 9 | 2 |
| Q9NQG5     | Regulation of nuclear pre-mRNA domain-containing protein 1B                      | RPRD1B    | 36.9  | 85  | 12 | 3 | 6 | 4 |
| P69905     | Hemoglobin subunit alpha                                                         | HBA1      | 15.2  | 70  | 8  | 3 | 5 | 2 |

|            |                                                      |           |       |     |    |   |   |    |
|------------|------------------------------------------------------|-----------|-------|-----|----|---|---|----|
| Q5QNW6     | Histone H2B type 2-F                                 | H2BC18    | 13.9  | 401 | 37 | 3 | 6 | 10 |
| Q2TAY7     | WD40 repeat-containing protein SMU1                  | SMU1      | 57.5  | 88  | 5  | 3 | 7 | 4  |
| Q8NAB2     | Kelch repeat and BTB domain-containing protein 3     | KBTBD3    | 69.8  | 22  | 1  | 3 | 6 | 2  |
| P61326     | Protein mago nashi homolog                           | MAGOH     | 17.2  | 33  | 8  | 3 | 4 | 2  |
| P11766     | Alcohol dehydrogenase class-3                        | ADH5      | 39.7  | 23  | 2  | 3 | 7 | 2  |
| A0A075B6S5 | Immunoglobulin kappa variable 1-27                   | IGKV1-27  | 12.7  | 49  | 14 | 3 | 4 | 3  |
| Q8NC24     | RELT-like protein 2                                  | RELL2     | 32.4  | 24  | 2  | 3 | 7 | 2  |
| O95373     | Importin-7                                           | IPO7      | 119.4 | 53  | 1  | 3 | 3 | 2  |
| P06730     | Eukaryotic translation initiation factor 4E          | EIF4E     | 25.1  | 24  | 7  | 3 | 5 | 1  |
| Q92615     | La-related protein 4B                                | LARP4B    | 80.5  | 20  | 1  | 3 | 6 | 1  |
| Q14152     | Eukaryotic translation initiation factor 3 subunit A | EIF3A     | 166.5 | 68  | 3  | 3 | 8 | 4  |
| Q13895     | Bystin                                               | BYSL      | 49.6  | 65  | 5  | 3 | 4 | 3  |
| Q13765     | Nascent polypeptide-associated complex subunit alpha | NACA      | 23.4  | 33  | 8  | 3 | 4 | 3  |
| A0A0B4J2D9 | Immunoglobulin kappa variable 1D-13                  | IGKV1D-13 | 12.6  | 35  | 15 | 3 | 8 | 1  |
| Q9H361     | Polyadenylate-binding protein 3                      | PABPC3    | 70    | 970 | 26 | 3 | 8 | 28 |
| Q92545     | Transmembrane protein 131                            | TMEM131   | 205   | 24  | 0  | 3 | 5 | 2  |
| Q16891     | MICOS complex subunit MIC60                          | IMMT      | 83.6  | 47  | 4  | 3 | 8 | 2  |
| P29401     | Transketolase                                        | TKT       | 67.8  | 56  | 3  | 3 | 6 | 2  |
| Q02218     | 2-oxoglutarate dehydrogenase, mitochondrial          | OGDH      | 115.9 | 73  | 3  | 3 | 6 | 5  |
| Q7LGA3     | Heparan sulfate 2-O-sulfotransferase 1               | HS2ST1    | 41.9  | 26  | 3  | 3 | 4 | 3  |
| Q16637     | Survival motor neuron protein                        | SMN1      | 31.8  | 77  | 7  | 3 | 4 | 5  |
| P55010     | Eukaryotic translation initiation factor 5           | EIF5      | 49.2  | 25  | 5  | 3 | 7 | 2  |
| P55786     | Puromycin-sensitive aminopeptidase                   | NPEPPS    | 103.2 | 49  | 1  | 3 | 8 | 3  |
| Q9BRZ2     | E3 ubiquitin-protein ligase TRIM56                   | TRIM56    | 81.4  | 26  | 5  | 3 | 4 | 1  |
| P04004     | Vitronectin                                          | VTN       | 54.3  | 49  | 3  | 3 | 8 | 1  |
| Q14331     | Protein FRG1                                         | FRG1      | 29.2  | 55  | 5  | 3 | 4 | 2  |
| Q8WXF0     | Serine/arginine-rich splicing factor 12              | SRSF12    | 30.5  | 22  | 4  | 3 | 6 | 3  |
| P63208     | S-phase kinase-associated protein 1                  | SKP1      | 18.6  | 45  | 7  | 3 | 6 | 1  |
| P11388     | DNA topoisomerase 2-alpha                            | TOP2A     | 174.3 | 39  | 2  | 3 | 6 | 1  |
| Q5TBA9     | Protein furry homolog                                | FRY       | 338.7 | 28  | 1  | 3 | 7 | 2  |
| P12956     | X-ray repair cross-complementing protein 6           | XRCC6     | 69.8  | 136 | 8  | 3 | 4 | 4  |
| P62826     | GTP-binding nuclear protein Ran                      | RAN       | 24.4  | 35  | 8  | 3 | 8 | 1  |
| P14174     | Macrophage migration inhibitory factor               | MIF       | 12.5  | 31  | 11 | 3 | 4 | 3  |
| Q71RC2     | La-related protein 4                                 | LARP4     | 80.5  | 78  | 3  | 3 | 5 | 1  |
| P53618     | Coatomer subunit beta                                | COPB1     | 107.1 | 41  | 1  | 3 | 6 | 3  |
| Q9Y277     | Voltage-dependent anion-selective channel protein 3  | VDAC3     | 30.6  | 46  | 4  | 3 | 7 | 3  |
| Q13263     | Transcription intermediary factor 1-beta             | TRIM28    | 88.5  | 87  | 4  | 3 | 3 | 4  |

|            |                                                                                   |          |       |     |    |   |   |   |
|------------|-----------------------------------------------------------------------------------|----------|-------|-----|----|---|---|---|
| P17858     | ATP-dependent 6-phosphofructokinase, liver type                                   | PFKL     | 85    | 46  | 3  | 3 | 5 | 1 |
| Q9BW92     | Threonine--tRNA ligase, mitochondrial                                             | TARS2    | 81    | 29  | 3  | 3 | 7 | 2 |
| O95163     | Elongator complex protein 1                                                       | ELP1     | 150.2 | 24  | 2  | 3 | 6 | 1 |
| P09429     | High mobility group protein B1                                                    | HMGB1    | 24.9  | 25  | 9  | 3 | 3 | 1 |
| Q86TB9     | Protein PAT1 homolog 1                                                            | PATL1    | 86.8  | 38  | 2  | 3 | 6 | 3 |
| P48634     | Protein PRRC2A                                                                    | PRRC2A   | 228.7 | 45  | 2  | 3 | 5 | 3 |
| Q8N511     | Transmembrane protein 199                                                         | TMEM199  | 23.1  | 29  | 6  | 3 | 4 | 1 |
| P17612     | cAMP-dependent protein kinase catalytic subunit alpha                             | PRKACA   | 40.6  | 26  | 4  | 3 | 4 | 1 |
| P49790     | Nuclear pore complex protein Nup153                                               | NUP153   | 153.8 | 110 | 6  | 3 | 6 | 4 |
| P13667     | Protein disulfide-isomerase A4                                                    | PDIA4    | 72.9  | 32  | 3  | 3 | 8 | 2 |
| P33992     | DNA replication licensing factor MCM5                                             | MCM5     | 82.2  | 112 | 7  | 3 | 8 | 5 |
| P30153     | Serine/threonine-protein phosphatase 2A 65 kDa regulatory subunit A alpha isoform | PPP2R1A  | 65.3  | 23  | 4  | 3 | 6 | 2 |
| P31948     | Stress-induced-phosphoprotein 1                                                   | STIP1    | 62.6  | 32  | 2  | 3 | 7 | 1 |
| P49643     | DNA primase large subunit                                                         | PRIM2    | 58.8  | 38  | 4  | 2 | 2 | 3 |
| Q13610     | Periodic tryptophan protein 1 homolog                                             | PWP1     | 55.8  | 46  | 5  | 2 | 7 | 3 |
| O60281     | Zinc finger protein 292                                                           | ZNF292   | 304.6 | 31  | 2  | 2 | 2 | 2 |
| P12004     | Proliferating cell nuclear antigen                                                | PCNA     | 28.8  | 75  | 9  | 2 | 4 | 4 |
| O75494     | Serine/arginine-rich splicing factor 10                                           | SRSF10   | 31.3  | 45  | 6  | 2 | 5 | 1 |
| Q14247     | Src substrate cortactin                                                           | CTTN     | 61.5  | 40  | 2  | 2 | 6 | 3 |
| P61962     | DDB1- and CUL4-associated factor 7                                                | DCAF7    | 38.9  | 27  | 3  | 2 | 5 | 2 |
| Q8WXF1     | Paraspeckle component 1                                                           | PSPC1    | 58.7  | 35  | 6  | 2 | 6 | 3 |
| A0A075B6I1 | Immunoglobulin lambda variable 4-60                                               | IGLV4-60 | 13    | 51  | 8  | 2 | 4 | 2 |
| O14980     | Exportin-1                                                                        | XPO1     | 123.3 | 22  | 1  | 2 | 3 | 2 |
| Q92979     | Ribosomal RNA small subunit methyltransferase NEP1                                | EMG1     | 26.7  | 41  | 9  | 2 | 7 | 2 |
| P52756     | RNA-binding protein 5                                                             | RBM5     | 92.1  | 24  | 4  | 2 | 4 | 1 |
| P09211     | Glutathione S-transferase P                                                       | GSTP1    | 23.3  | 67  | 17 | 2 | 5 | 2 |
| P52907     | F-actin-capping protein subunit alpha-1                                           | CAPZA1   | 32.9  | 21  | 6  | 2 | 4 | 3 |
| Q9Y3Z3     | Deoxynucleoside triphosphate triphosphohydrolase SAMHD1                           | SAMHD1   | 72.2  | 42  | 3  | 2 | 7 | 3 |
| Q96QU6     | l-aminocyclopropane-1-carboxylate synthase-like protein 1                         | ACCS     | 57.3  | 29  | 4  | 2 | 7 | 3 |
| Q52LJ0     | Protein FAM98B                                                                    | FAM98B   | 45.5  | 117 | 11 | 2 | 3 | 4 |
| Q9NUD5     | Zinc finger CCHC domain-containing protein 3                                      | ZCCHC3   | 43.5  | 51  | 6  | 2 | 2 | 3 |
| P27824     | Calnexin                                                                          | CANX     | 67.5  | 70  | 5  | 2 | 5 | 1 |
| P35579     | Myosin-9                                                                          | MYH9     | 226.4 | 87  | 3  | 2 | 6 | 3 |
| Q3B820     | Protein FAM161A                                                                   | FAM161A  | 76.7  | 22  | 1  | 2 | 4 | 3 |
| Q8NG50     | RAD52 motif-containing protein 1                                                  | RDM1     | 31.9  | 27  | 3  | 2 | 5 | 3 |
| Q969Q0     | 60S ribosomal protein L36a-like                                                   | RPL36AL  | 12.5  | 54  | 10 | 2 | 5 | 4 |

|        |                                                                      |          |       |     |    |   |   |    |
|--------|----------------------------------------------------------------------|----------|-------|-----|----|---|---|----|
| O00303 | Eukaryotic translation initiation factor 3 subunit F                 | EIF3F    | 37.5  | 100 | 9  | 2 | 5 | 2  |
| O00139 | Kinesin-like protein KIF2A                                           | KIF2A    | 79.9  | 110 | 3  | 2 | 2 | 4  |
| Q96DA6 | Mitochondrial import inner membrane translocase subunit TIM14        | DNAJC19  | 12.5  | 95  | 18 | 2 | 6 | 2  |
| Q9Y3D9 | 28S ribosomal protein S23, mitochondrial                             | MRPS23   | 21.8  | 47  | 6  | 2 | 4 | 3  |
| Q8WXQ8 | Carboxypeptidase A5                                                  | CPA5     | 49    | 25  | 3  | 2 | 4 | 3  |
| P24752 | Acetyl-CoA acetyltransferase, mitochondrial                          | ACAT1    | 45.2  | 53  | 6  | 2 | 2 | 1  |
| Q9Y3C1 | Nucleolar protein 16                                                 | NOP16    | 21.2  | 67  | 9  | 2 | 2 | 3  |
| Q99497 | Parkinson disease protein 7                                          | PARK7    | 19.9  | 26  | 6  | 2 | 2 | 2  |
| P06312 | Immunoglobulin kappa variable 4-1                                    | IGKV4-1  | 13.4  | 83  | 22 | 2 | 7 | 4  |
| Q9Y487 | V-type proton ATPase 116 kDa subunit a2                              | ATP6V0A2 | 98    | 28  | 2  | 2 | 3 | 2  |
| Q07021 | Complement component 1 Q subcomponent-binding protein, mitochondrial | C1QBP    | 31.3  | 40  | 8  | 2 | 6 | 3  |
| Q9Y262 | Eukaryotic translation initiation factor 3 subunit L                 | EIF3L    | 66.7  | 33  | 3  | 2 | 6 | 1  |
| O95470 | Sphingosine-1-phosphate lyase 1                                      | SGPL1    | 63.5  | 75  | 5  | 2 | 2 | 2  |
| O75521 | Enoyl-CoA delta isomerase 2                                          | ECI2     | 43.6  | 122 | 4  | 2 | 6 | 3  |
| Q15637 | Splicing factor 1                                                    | SF1      | 68.3  | 60  | 3  | 2 | 2 | 1  |
| P27169 | Serum paraoxonase/arylesterase 1                                     | PON1     | 39.7  | 35  | 5  | 2 | 7 | 1  |
| Q13724 | Mannosyl-oligosaccharide glucosidase                                 | MOGS     | 91.9  | 107 | 4  | 2 | 5 | 3  |
| P50993 | Sodium/potassium-transporting ATPase subunit alpha-2                 | ATP1A2   | 112.2 | 54  | 2  | 2 | 5 | 3  |
| P27348 | 14-3-3 protein theta                                                 | YWHAQ    | 27.7  | 181 | 20 | 2 | 6 | 4  |
| P18206 | Vinculin                                                             | VCL      | 123.7 | 31  | 2  | 2 | 2 | 1  |
| Q9BVA0 | Katanin p80 WD40 repeat-containing subunit B1                        | KATNB1   | 72.3  | 58  | 7  | 2 | 7 | 2  |
| Q9BWW9 | Apolipoprotein L5                                                    | APOL5    | 47    | 32  | 4  | 2 | 2 | 1  |
| Q9H8H0 | Nucleolar protein 11                                                 | NOL11    | 81.1  | 24  | 2  | 2 | 7 | 2  |
| P68371 | Tubulin beta-4B chain                                                | TUBB4B   | 49.8  | 773 | 46 | 2 | 2 | 23 |
| Q9BRP8 | Partner of Y14 and mago                                              | PYM1     | 22.6  | 40  | 9  | 2 | 4 | 1  |
| P11908 | Ribose-phosphate pyrophosphokinase 2                                 | PRPS2    | 34.7  | 101 | 11 | 2 | 2 | 3  |
| P18669 | Phosphoglycerate mutase 1                                            | PGAM1    | 28.8  | 49  | 18 | 2 | 6 | 3  |
| P30101 | Protein disulfide-isomerase A3                                       | PDIA3    | 56.7  | 40  | 3  | 2 | 6 | 1  |
| Q9C0J8 | pre-mRNA 3' end processing protein WDR33                             | WDR33    | 145.8 | 38  | 2  | 2 | 7 | 1  |
| Q9Y5G1 | Protocadherin gamma-B3                                               | PCDHGB3  | 101.1 | 37  | 3  | 1 | 2 | 2  |
| P18085 | ADP-ribosylation factor 4                                            | ARF4     | 20.5  | 28  | 6  | 1 | 5 | 3  |
| Q7KZF4 | Staphylococcal nuclease domain-containing protein 1                  | SND1     | 101.9 | 41  | 3  | 1 | 4 | 2  |
| O00410 | Importin-5                                                           | IPO5     | 123.6 | 70  | 3  | 1 | 4 | 2  |
| P56270 | Myc-associated zinc finger protein                                   | MAZ      | 48.6  | 43  | 3  | 1 | 6 | 1  |
| Q5BKZ1 | DBIRD complex subunit ZNF326                                         | ZNF326   | 65.6  | 84  | 5  | 1 | 4 | 2  |



|        |                                                                |          |       |    |    |   |   |   |
|--------|----------------------------------------------------------------|----------|-------|----|----|---|---|---|
| P23284 | Peptidyl-prolyl cis-trans isomerase B                          | PPIB     | 23.7  | 42 | 8  | 1 | 4 | 1 |
| Q96G21 | U3 small nucleolar ribonucleoprotein protein IMP4              | IMP4     | 33.7  | 90 | 6  | 1 | 3 | 2 |
| Q13561 | Dynactin subunit 2                                             | DCTN2    | 44.2  | 35 | 7  | 1 | 1 | 1 |
| Q6P1J9 | Parafibromin                                                   | CDC73    | 60.5  | 35 | 5  | 1 | 5 | 3 |
| Q96GM8 | Target of EGR1 protein 1                                       | TOE1     | 56.5  | 27 | 3  | 1 | 1 | 2 |
| Q5JTW2 | Centrosomal protein of 78 kDa                                  | CEP78    | 76.3  | 27 | 4  | 1 | 3 | 3 |
| P49006 | MARCKS-related protein                                         | MARCKSL1 | 19.5  | 30 | 8  | 1 | 4 | 3 |
| P46736 | Lys-63-specific deubiquitinase BRCC36                          | BRCC3    | 36    | 38 | 3  | 1 | 3 | 2 |
| Q8NEJ9 | Neuroguidin                                                    | NGDN     | 35.9  | 49 | 8  | 1 | 4 | 1 |
| Q15758 | Neutral amino acid transporter B(0)                            | SLC1A5   | 56.6  | 52 | 2  | 1 | 2 | 2 |
| P48444 | Coatomer subunit delta                                         | ARCN1    | 57.2  | 23 | 4  | 1 | 1 | 3 |
| Q96DV4 | 39S ribosomal protein L38, mitochondrial                       | MRPL38   | 44.6  | 40 | 4  | 1 | 2 | 2 |
| Q9P2J5 | Leucine--tRNA ligase, cytoplasmic                              | LARS1    | 134.4 | 46 | 4  | 1 | 1 | 1 |
| Q8IX18 | Probable ATP-dependent RNA helicase DHX40                      | DHX40    | 88.5  | 33 | 3  | 1 | 5 | 1 |
| Q9Y5B8 | Nucleoside diphosphate kinase 7                                | NME7     | 42.5  | 26 | 4  | 1 | 4 | 2 |
| Q9ULC4 | Malignant T-cell-amplified sequence 1                          | MCTS1    | 20.5  | 29 | 9  | 1 | 2 | 2 |
| P13861 | cAMP-dependent protein kinase type II-alpha regulatory subunit | PRKAR2A  | 45.5  | 32 | 5  | 1 | 1 | 1 |
| P16615 | Sarcoplasmic/endoplasmic reticulum calcium ATPase 2            | ATP2A2   | 114.7 | 36 | 3  | 1 | 6 | 2 |
| Q9UGR2 | Zinc finger CCCH domain-containing protein 7B                  | ZC3H7B   | 109.8 | 49 | 1  | 1 | 6 | 3 |
| P49915 | GMP synthase [glutamine-hydrolyzing]                           | GMPS     | 76.7  | 79 | 4  | 1 | 2 | 2 |
| Q9NZN5 | Rho guanine nucleotide exchange factor 12                      | ARHGEF12 | 173.1 | 27 | 2  | 1 | 3 | 1 |
| Q9Y4W2 | Ribosomal biogenesis protein LAS1L                             | LAS1L    | 83    | 26 | 5  | 1 | 4 | 3 |
| Q9BV38 | WD repeat-containing protein 18                                | WDR18    | 47.4  | 31 | 2  | 1 | 1 | 1 |
| Q9Y512 | Sorting and assembly machinery component 50 homolog            | SAMM50   | 51.9  | 35 | 3  | 1 | 6 | 3 |
| Q13425 | Beta-2-syntrophin                                              | SNTB2    | 57.9  | 23 | 3  | 1 | 3 | 2 |
| O14735 | CDP-diacylglycerol--inositol 3-phosphatidyltransferase         | CDIPT    | 23.5  | 25 | 6  | 1 | 4 | 3 |
| Q9UHV9 | Prefoldin subunit 2                                            | PFDN2    | 16.6  | 33 | 11 | 1 | 1 | 2 |
| Q9H967 | WD repeat-containing protein 76                                | WDR76    | 69.7  | 38 | 1  | 1 | 4 | 2 |
| P51149 | Ras-related protein Rab-7a                                     | RAB7A    | 23.5  | 26 | 7  | 1 | 6 | 3 |
| Q9NUQ6 | SPATS2-like protein                                            | SPATS2L  | 61.7  | 29 | 4  | 1 | 4 | 1 |

**Table S2** shRNA sequences used in this study

| shRNA         |         | 5' to 3'                           |
|---------------|---------|------------------------------------|
| HMGB1<br>Sh#1 | forward | 5'-AGACCUGAGAAUGUAUCCCCAAADdtdt-3' |
|               | reverse | 5'-UUUGGGGAUACAUUCUCAGGUCUdTdT-3'  |

**Table S3** PCR primers of USP15 and HMGB1 used in this study

| primers |         | 5' to 3'                       |
|---------|---------|--------------------------------|
| USP15   | forward | 5'-ACGCTGCTCAAAACCTCG-3'       |
|         | reverse | 5'-ACATACCCTGTTCAACCACCT-3'    |
| HMGB1   | forward | 5'-GCGAAGAACTGGGAGAGATGTG-3'   |
|         | reverse | 5'-GCATCAGGCTTTCCTTTAGCTCG--3' |
